# Supplementary material for: Combination of in silico and molecular techniques for discrimination and virulence characterization of marine Brucella ceti and Brucella pinnipedialis
Source: Front Microbiol. 2024 Sep 18;15:1437408. doi: 10.3389/fmicb.2024.1437408 (PMC11444999; doi:10.3389/fmicb.2024.1437408)
Supplement: Supplementary Table S2 — All data concerning detection of 53 virulence genes with in silico methods (Abricate=A and BioNumeriscs=B) and gel visualization of PCR (PCR=P). [file Table_2.XLSX]

## Sheet: Feuil1
Genus	Species	Biovar	Strain name	DNA available in our laboratory	Origin of genome	BioSample	Bio Project	Assembly	Accession number	Collection date	Year of isolation	Isolation country	Host	Isolation source	N° of read sequences associated to reference sequence	Percentage of read sequences associated to reference sequence	Total n° of SNPs found	Total n° of SNPs after filtering
Brucella	abortus	1	544	yes	Ward et al. Unpublished	SAMN00839704	PRJNA173507	GCA_000369945.1	AQIS00000000	NR	NR	United Kingdom	Cattle, Bos taurus	cattle	616423	93.7312	511156	6111
Brucella	melitensis	1	16M	yes	DelVecchio et al. 2002	SAMN02603416	PRJNA224116	GCF_000007125.1	NC_003317.1, NC_003318.1	NR	NR	NR	Human	infected goat
Brucella	suis	2	Thomsen	yes	Setubal et al. Unpublished	SAMN02604298	PRJNA20371	GCA_000018905.1	CP000911, CP000912	NR	NR	NR	NR	NR	612953	92.4627
Brucella	ceti	NR	M13-05-1	no	Ward et al. Unpublished	SAMN02595284	PRJNA33043	GCA_000157855.1	ACBP00000000	NR	NR	NR	NR	NR	607212	92.924
Brucella	ceti	NR	M490-95-1	no	Ward et al. Unpublished	SAMN02595291	PRJNA33571	GCA_000158755.1	ACEJ00000000	NR	NR	NR	NR	NR	606897	93.1967
Brucella	ceti	NR	M644-93-1 (94-75)	yes	Ward et al. Unpublished	SAMN02595283	PRJNA33041	GCA_000157835.1	ACBO00000000	NR	NR	NR	NR	NR	607495	92.8749
Brucella	ceti	NR	Cudo	no	Setubal et al. Unpublished	SAMN02472088	PRJNA33611	GCA_000182425.1	ACJD00000000	NR	NR	NR	Bottlenose dolphin, Tursiops truncatus	bottlenose dolphin (Tursiops truncatus)	611635	90.2516
Brucella	ceti	NR	TE10759-12	no	Ancora et al. 2014	SAMN02402452	PRJNA227977	GCA_000590795.1	CP006896, CP006897	NR	NR	Adriatic Sea	Striped dolphin, Stenella coeruleoalba	brain	612499	93.4257
Brucella	ceti	NR	TE28753-12	no	Ancora et al. 2014	SAMN02371861	PRJNA227567	GCA_000590815.1	CP006898, CP006899	2012	2012	Adriatic Sea coasts	Striped dolphin, Stenella coeruleoalba	brain tissue	571984	87.2592
Brucella	ceti	NR	BD1442	no	Ueno et al. 2020	SAMD00233783	PRJDB10122	GCA_014193785.1	BLZI00000000	2018	2018	Japan	Bottlenose dolphin, Tursiops truncatus	isolated for the first time in the western Pacific from a bottlenose dolphin	618028	91.9479
Brucella	ceti	NR	CRO350	no	Duvnjak et al. Unpublished	SAMN07270939	PRJNA391578	GCA_002245555.1	NKHE00000000	2015	2015	Croatia	Bottlenose dolphin, Tursiops truncatus	multiple lymph nodes	612687	91.2755
Brucella	ceti	NR	B1-94 (94-74)	yes	Ward et al. Unpublished	SAMN02595292	PRJNA33573	GCA_000158775.1	ACEK00000000	NR	NR	NR	NR	NR	608048	93.1303
Brucella	ceti	NR	bmarCR10	no	Orsini et al. 2022b	SAMEA2224239	PRJEB4782		ERR418023	2010	2010	Costa Rica	Stenella coeruleoalba	Cerebrospinal fluid	904917	81.5704
Brucella	ceti	NR	bmarCR11	no	Orsini et al. 2022b	SAMEA2224240	PRJEB4782		ERR418024	2011	2011	Costa Rica	S. coeruleoalba	Cerebrospinal fluid	720322	80.4711
Brucella	ceti	NR	bmarCR15	no	Orsini et al. 2022b	SAMEA2224241	PRJEB4782		ERR418025	2012	2012	Costa Rica	S. coeruleoalba	Cerebrospinal fluid	816487	83.4613
Brucella	ceti	NR	bmarCR3	no	Orsini et al. 2022b	SAMEA2266856	PRJEB4782		ERR471312	2007	2007	Costa Rica	S. coeruleoalba	Cerebrospinal fluid	212360	90.6909
Brucella	ceti	NR	bmarCR13	no	Orsini et al. 2022b	SAMEA2266867	PRJEB4782		ERR471316	2011	2011	Costa Rica	S. coeruleoalba	Cerebrospinal fluid	1561025	90.865
Brucella	ceti	NR	bmarCR14	no	Orsini et al. 2022b	SAMEA2266868	PRJEB4782		ERR471317	2011	2011	Costa Rica	S. coeruleoalba	Cerebrospinal fluid	1616414	90.8475
Brucella	ceti	NR	bmarCR16	no	Orsini et al. 2022b	SAMEA2266870	PRJEB4782		ERR471318	2012	2012	Costa Rica	S. coeruleoalba	Cerebrospinal fluid	1705979	90.7916
Brucella	ceti	NR	bmarCR17	no	Orsini et al. 2022b	SAMEA2266871	PRJEB4782		ERR471319	2012	2012	Costa Rica	S. coeruleoalba	Cerebrospinal fluid	1706030	90.6582
Brucella	ceti	NR	bmarCR18	no	Orsini et al. 2022b	SAMEA2266872	PRJEB4782		ERR471320	2013	2013	Costa Rica	S. coeruleoalba	Cerebrospinal fluid	1871876	90.7537
Brucella	ceti	NR	bmarCR19	no	Orsini et al. 2022b	SAMEA2266873	PRJEB4782		ERR471321	2013	2013	Costa Rica	S. coeruleoalba	Cerebrospinal fluid	1945808	90.6279
Brucella	ceti	NR	bmarCR20	no	Orsini et al. 2022b	SAMEA2266874	PRJEB4782		ERR471322	2013	2013	Costa Rica	S. coeruleoalba	Cerebrospinal fluid	2039431	90.7999
Brucella	ceti	NR	bmarCR20w	no	Orsini et al. 2022b	SAMEA2266875	PRJEB4782		ERR471323	2013	2013	Costa Rica	S. coeruleoalba	Lung worm	1769894	90.9609
Brucella	ceti	NR	bmarCR20lu	no	Orsini et al. 2022b	SAMEA2266876	PRJEB4782		ERR471324	2013	2013	Costa Rica	S. coeruleoalba	Lung	1644728	91.0048
Brucella	ceti	NR	bmarMR24	no	Orsini et al. 2022b	SAMEA2266877	PRJEB4782		ERR471325	2012	2012	Spain	S. coeruleoalba	Cerebrospinal fluid	1494091	90.5189
Brucella	ceti	NR	bmarMR25	no	Orsini et al. 2022b	SAMEA2266878	PRJEB4782		ERR471326	2012	2012	Spain	Tursiops truncatus	Vertebral abscess	1795847	90.614
Brucella	ceti	NR	bmarMR26	no	Orsini et al. 2022b	SAMEA2266879	PRJEB4782		ERR471327	2009	2009	Spain	S. coeruleoalba	Spleen	1797565	90.5938
Brucella	ceti	NR	bmarCR9	no	Orsini et al. 2022b	SAMEA2266863	PRJEB4782		ERR473728	2009	2009	Costa Rica	S. coeruleoalba	Cerebrospinal fluid	2133796	90.2981
Brucella	ceti	NR	bmarCR12	no	Orsini et al. 2022b	SAMEA2266866	PRJEB4782		ERR473729	2011	2011	Costa Rica	S. coeruleoalba	Cerebrospinal fluid	1585385	90.8036
Brucella	ceti	NR	bmarCR8	no	Orsini et al. 2022b	SAMEA2266861	PRJEB4782		ERR485944	2009	2009	Costa Rica	S. coeruleoalba	Cerebrospinal fluid	1922135	90.3531
Brucella	ceti	NR	bmarCR8w	no	Orsini et al. 2022b	SAMEA2266862	PRJEB4782		ERR485945	2009	2009	Costa Rica	S. coeruleoalba	Lung worm	1594246	90.0321
Brucella	ceti	NR	M187/00/1 (alias: bmarMR6, bmar162)	no	Orsini et al. 2022b	SAMEA2266885	PRJEB4782		ERR485947	2000	2000	Great Britain	L. acutus	Spleen	1541918	89.7784
Brucella	ceti	NR	M78/05/2 (alias: bmarMR10, UK14/05, bmar178)	no	Orsini et al. 2022b	SAMEA2266888	PRJEB4782		ERR485948	2005	2005	Great Britain	P. phocoena	Vertebral lesion	1635763	89.8423
Brucella	ceti	NR	B202R-F7 (alias: F14/02, bmarMR15, bmar101)	no	Orsini et al. 2022b	SAMEA2266890	PRJEB4782		ERR485949	1995	1995	Norway	Balaenoptera acutorostrata	Spleen, liver	1643513	90.1267
Brucella	ceti	NR	M452/97/2 (alias: bmarMR17, UK3/97, bmar115)	no	Orsini et al. 2022b	SAMEA2266892	PRJEB4782		ERR485951	1997	1997	Great Britain	D. delphis	Spleen	15111400	90.0877
Brucella	ceti	NR	M166/94/3 (alias: bmarMR9, bmar013)	no	Orsini et al. 2022b	SAMEA2382543	PRJEB4782		ERR554829	1994	1994	Great Britain	P. phocoena	Uterus	1798204	79.8987
Brucella	ceti	NR	bmarCR21-sc-2150391	no	Orsini et al. 2022b	SAMEA2821530	PRJEB4782		ERR775242	NA	NA	NA	NA	NA	2143155	88.6967
Brucella	ceti	NR	bmarCR22-sc-2150399	no	Orsini et al. 2022b	SAMEA2821538	PRJEB4782		ERR775249	NA	NA	NA	NA	NA	2113890	88.5527
Brucella	ceti	NR	bmarCR5	no	Orsini et al. 2022b	SAMEA2821539	PRJEB4782		ERR775250	2006	2006	Costa Rica	S. coeruleoalba	Cerebrospinal fluid	2367762	88.6873
Brucella	ceti	NR	2018-TE-25153	no	Orsini et al. 2022b	SAMN14558829	PRJNA623338		SRR11510450	2018	2018	Italy	S. coeruleoalba	CNS	1343369	92.2656
Brucella	ceti	NR	2018-TE-1259	no	Orsini et al. 2022b	SAMN14558828	PRJNA623338		SRR11510451	2017	2017	Italy	S. coeruleoalba	CNS	378441	91.9338
Brucella	ceti	NR	2018-TE-17753	no	Orsini et al. 2022b	SAMN14558827	PRJNA623338		SRR11510452	2017	2017	Italy	S. coeruleoalba	CNS	452181	90.3404
Brucella	ceti	NR	2017-TE-3838	no	Orsini et al. 2022b	SAMN14558826	PRJNA623338		SRR11510453	2017	2017	Italy	S. coeruleoalba	CNS	916452	70.5868
Brucella	ceti	NR	2015-TE-2780	no	Orsini et al. 2022b	SAMN14558825	PRJNA623338		SRR11510454	2014	2014	Italy	S. coeruleoalba	CNS	389616	83.1948
Brucella	ceti	NR	2013-TE-31957	no	Orsini et al. 2022b	SAMN14558824	PRJNA623338		SRR11510455	2013	2013	Italy	S. coeruleoalba	CNS	1120122	91.2491
Brucella	ceti	NR	17	no	Orsini et al. 2022b	SAMN17035672	PRJNA683710		SRR13221976	2017	2017	NA	NA	Placenta	957495	88.9047
Brucella	ceti	NR	B14-94	no	Orsini et al. 2022b	SAMN05417893	PRJNA251693		SRR4038979	NA	NA	NA	NA	NA	1099314	82.4739
Brucella	ceti	NR	M2194-94-1	no	Orsini et al. 2022b	SAMN05417894	PRJNA251693		SRR4038980	NA	NA	NA	NA	NA	970128	82.786
Brucella	ceti	NR	B92-1350	no	Orsini et al. 2022b	SAMN05417895	PRJNA251693		SRR4038981	NA	NA	NA	NA	NA	187663	28.2725
Brucella	ceti	NR	97-7763-2	yes	This study	SAMEA114598193	PRJEB70709		ERS16791920	1997	1997	France	Bottlenose dolphin, Tursiops truncatus	NR	185046	83.4744
Brucella	ceti	NR	05-684-1145 R1F	yes	This study	SAMEA114598194	PRJEB70709		ERS16791921	2005	2005	France	Harbour porpoise, Phocoena phocoena	NR	490633	86.2118
Brucella	ceti	NR	05-684	yes	This study	SAMEA114598195	PRJEB70709		ERS16791922	2005	2005	France	Harbour porpoise, Phocoena phocoena	NR	714597	85.463
Brucella	ceti	NR	05-684-1143 F1F	yes	This study	SAMEA114598196	PRJEB70709		ERS16791923	2005	2005	France	Harbour porpoise, Phocoena phocoena	NR	264887	82.1291
Brucella	ceti	NR	05-684-1144 F2TM	yes	This study	SAMEA114598197	PRJEB70709		ERS16791924	2005	2005	France	Harbour porpoise, Phocoena phocoena	NR	114027	68.4046
Brucella	ceti	NR	09-601-1272	yes	This study	SAMEA114598198	PRJEB70709		ERS16791925	2009	2009	France	Bottlenose dolphin, Tursiops truncatus	NR	520329	86.2908
Brucella	ceti	NR	12-1944-A (4453)	yes	This study	SAMEA114598199	PRJEB70709		ERS16791926	2012	2012	United Kingdom	Harbour porpoise, Phocoena phocoena	NR	169612	83.8476
Brucella	ceti	NR	12-1944-B (6186)	yes	This study	SAMEA114598200	PRJEB70709		ERS16791927	2012	2012	United Kingdom	Harbour porpoise, Phocoena phocoena	NR	156371	86.4798
Brucella	ceti	NR	14-901	yes	This study	SAMEA114598201	PRJEB70709		ERS16791929	2014	2014	Finland	Grey seal, Halichoerus grypus	NR	108598	83.2673
Brucella	ceti	NR	15-1717-6196	yes	This study	SAMEA114598204	PRJEB70709		ERS16791932	2015	2015	France	Striped dolphin, Stenella coeruleoalba	NR	63172	81.7422
Brucella	pinnipedialis	NR	B2-94 (94-73)	yes	Audic et al. 2011	SAMN02603341	PRJNA41867	GCA_000221005.1	NC_015857.1, NC_015858.1	NR	NR	NR	Harbor seal, Phoca vitulina	the spleen of a common seal (Phoca vitulina)	624064	91.7944
Brucella	pinnipedialis	NR	M292/94/1	no	Ward et al. Unpublished	SAMN02595287	PRJNA33563	GCA_000158675.1	ACEF00000000	NR	NR	NR	Harbor seal, Phoca vitulina	the common seal	612290	92.3723
Brucella	pinnipedialis	NR	M163/99/10	no	Ward et al. Unpublished	SAMN02595281	PRJNA33037	GCA_000157795.1	ACBM00000000	NR	NR	NR	NR	NR	600378	93.9066
Brucella	pinnipedialis	NR	6/566	no	Minogue et al. 2014	SAMN02781126	PRJNA243898	GCA_000740275.1	CP007742, CP007743	NR	NR	NR	NR	NR	623168	93.5407
Brucella	pinnipedialis	NR	15-1242-4197	yes	This study	SAMEA114598202	PRJEB70709		ERS16791930	2015	2015	Finland	Halichoerus grypus	NR	214114	82.9735
Brucella	pinnipedialis	NR	15-1242-4198	yes	This study	SAMEA114598203	PRJEB70709		ERS16791931	2015	2015	Finland	Halichoerus grypus	NR	140542	76.0143
Brucella	pinnipedialis	NR	23-a1	no	Zygmunt et al. Unpublished	SAMN16205670	PRJNA664313	GCA_015624465.1	CP061815, CP061816	2002	2002	Norway	Cystophora cristata	spleen	626126	94.5167
Brucella	pinnipedialis	NR	M2466/93/4 (alias: bmarMR7, bmar105)	no	Orsini et al. 2022b	SAMEA2266886	PRJEB4782		ERR471331	1993	1993	Great Britain	Phoca vitulina	Spleen	1738158	91.3099
Brucella	pinnipedialis	NR	M177/94/1 (alias: bmarMR16, bmar008)	no	Orsini et al. 2022b	SAMEA2266891	PRJEB4782		ERR485950	1994	1994	Great Britain	Lutra lutra	Internal iliac lymph node	1448313	89.0236
Brucella	pinnipedialis	NR	M192/00/1 (alias: bmarMR13, UK24/00, bmar160)	no	Orsini et al. 2022b	SAMEA2266889	PRJEB4782		ERR471332	2000	2000	Great Britain	Balaenoptera acutorostrata	Mesenteric lymph node	1651105	89.9434
Brucella	pinnipedialis	NR	17A1	no	Orsini et al. 2022b	SAMN05417908	PRJNA251693		SRR4038995	NA	NA	NA	NA	NA	996477	84.3401
Brucella	sp.	NR	F96/2	no	Ward et al. Unpublished	SAMN00839725	PRJNA173528	GCA_000371025.1	AQKU00000000	1996	1996	Germany	Harbour porpoise, Phocoena phocoena	NR	617694	92.58
Brucella	sp.	NR	F23/97	no	Ward et al. Unpublished	SAMN01047751	PRJNA176540	GCA_000370965.1	AQKR00000000	1997	1997	France	Dolphin	NR	613961	92.8977
Brucella	sp.	NR	F8/99	no	Ward et al. Unpublished	SAMN00811224	PRJNA173610	GCA_000371005.1	AQKT00000000	1999	1999	United States	Harbor seal, Phoca vitulina	NR	621008	93.8362
Brucella	sp.	NR	F5/99	no	Ward et al. Unpublished	SAMN02595303	PRJNA33767	GCA_000158995.1	ACFF00000000	NR	NR	NR	Bottlenose dolphin, Tursiops truncatus	bottlenose dolphin	602324	91.8107
Brucella	sp.	NR	F5/06	no	Ward et al. Unpublished	SAMN00839728	PRJNA173531	GCA_000370985.1	AQKS00000000	2006	2006	Spain	Dolphin	NR	618293	92.3998
Brucella	sp.	NR	56/94	no	Ward et al. Unpublished	SAMN00839716	PRJNA173519	GCA_000370925.1	AQKP00000000	1994	1994	NR	Hooded seal, Cystophora cristata	NR	621114	93.7248
Brucella	sp.	NR	UK40/99	no	Ward et al. Unpublished	SAMN00811228	PRJNA173594	GCA_000371065.1	AQKW00000000	1999	1999	United Kingdom	Grey seal, Halichoerus grypus	NR	62694	92.2189
Brucella	sp.	NR	UK38/05	no	Ward et al. Unpublished	SAMN00811227	PRJNA173611	GCA_000367125.1	AQNR00000000	2005	2005	United Kingdom	White sided dolphin, Lagenorhynchus obliquidens	NR	613463	92.7031
Brucella	sp.	NR	UK5/01	no	Ward et al. Unpublished	SAMN00811229	PRJNA173609	GCA_000367105.1	AQNS00000000	2001	2001	United Kingdom	Harbor seal, Phoca vitulina	NR	621395	92.2156
Brucella	sp.	NR	UK1/97	no	Ward et al. Unpublished	SAMN00811226	PRJNA173608	GCA_000371045.1	AQKV00000000	1997	1997	NR	Harbour porpoise, Phocoena phocoena	NR	613641	92.9407
